1 **Impact of vector control on effective population sizes; empirical evidence for a control-based**  
2 **genetic bottleneck in the tsetse fly *Glossina fuscipes*.**

3 **Authors**

4 Allan Muhwezi<sup>1,2</sup>, Lucas J. Cunningham<sup>1</sup>, Johan Esterhuizen<sup>1</sup>, Inaki Tirados<sup>1</sup>, Enock Matovu<sup>2</sup>, Martin J. Donnelly<sup>1,3</sup>, Stephen  
5 J. Torr<sup>1</sup>.

6 **Corresponding author; [amrgory@yahoo.com](mailto:amrgory@yahoo.com)**

7

8 **Affiliations**

- 9 1. Department of Vector Biology, Liverpool School of Tropical Medicine, Liverpool, UK  
10 2. College of Veterinary Medicine, Animal Resources and Biosecurity, Makerere University, Kampala, Uganda  
11 3. Parasites and Microbes Programme, Wellcome Sanger Institute, Hinxton, Cambridge  
12

13 **Abstract**

14 We investigated genetic variation at 37 newly-developed microsatellite loci in populations of the  
15 tsetse fly *Glossina fuscipes fuscipes* captured from the upper and lower reaches of a single  
16 hydrographical network within an endemic Human African Trypanosomiasis focus. Our primary aim  
17 was to assess the impact of vector control using insecticide-treated baits (Tiny Targets) on genetic  
18 structure. We initially used *STRUCTURE* to delineate geographical boundaries of two stable ‘ancestral’  
19 reference populations without any history of vector control but marked for either vector control  
20 (‘intervention’) or no control (‘non-intervention’). We then used the *ADMIXTURE* model to assess  
21 genetic divergence in temporal populations collected after vector control implementation. We applied  
22 the Linkage Disequilibrium method to explicitly measure spatial and temporal changes in effective  
23 population size ( $N_e$ ). We observed a significant reduction in  $N_e$  coincident with vector control, whereas  
24  $N_e$  remained stable in the non-intervention area. Our empirical findings show how classical population  
25 genetics approaches detected within a short period of time, a significant genetic bottleneck associated  
26 with vector control, and opens up the possibility of using routine genomic surveillance. We have also  
27 generated a resource of new genetic markers for studies on the population genetics of tsetse at finer-  
28 scale resolution.

29

30 **Funding**

31 This work was funded through a Wellcome Trust Master’s Fellowship in Public Health and Tropical  
32 Medicine awarded to Allan Muhwezi (103268/Z/13/Z).

33

34

35

36

37

38

39

## 40 Introduction

41 Human African Trypanosomiasis (HAT) or Sleeping sickness is a deadly parasitic disease endemic to  
42 tropical Africa. The disease is caused by subspecies of *Trypanosoma brucei* and is transmitted by tsetse  
43 flies (*Glossina* spp). There are two aetiological agents: *T. b. gambiense*, accounting for >95% of cases,  
44 and *T. b. rhodesiense*, which exhibit separate geographical ranges, ecologies, vectors, rates of disease  
45 progression and control strategies. Both diseases are usually fatal if left untreated.

46 Vector control has recently emerged as an important strategy in efforts to control and eliminate HAT  
47 (Lehane et al., 2016). This has greatly been facilitated by the development of eco-friendly tools (Torr  
48 et al., 2007), and new methods such as ‘Tiny Targets’, blue-black panels of insecticide treated baits,  
49 that are cost-effective and easier to deploy at large-scale in disease endemic foci (Lindh et al., 2009).  
50 A recent field trial of this new technology over a 500 Km<sup>2</sup> area in North-Western Uganda demonstrated  
51 a significant reduction in tsetse catches by ≈90% (Tirados et al., 2015). What this and other studies  
52 (Courtin et al., 2015, Mahamat et al., 2017) revealed was that monitoring the impact of vector control  
53 using sentinel traps is not only expensive but the low numbers of tsetse captured, particularly  
54 following the deployment of targets, make robust quantitative estimation of impact difficult. We  
55 postulated that genetic diversity methods may be a sensitive and more cost-effective method for  
56 estimating intervention impact by maximising the information derived from each collected individual.

57 In this study we used a panel of microsatellite markers that we recently developed, to assess whether  
58 vector control operations using the Tiny Targets were having an underlying effect of on the genetic  
59 structure of tsetse populations.

60

## 61 Methodology

### 62 Study site

63 The study was conducted in North-West Uganda along the Kochi River, the primary watercourse, in  
64 the Koboko HAT focus located between 3.451-3.465°N and 30°58′-31°03′E (shown in Figure 1). The  
65 river is about 70 km long and drains into the River Nile. The upper Kochi, within the treatment  
66 (intervention) block, is characterized by a patchwork of farmland and degraded natural savanna  
67 woodland. The lower reaches of the Kochi, outside the treatment (non-intervention) area, consist of  
68 dry thickets and wooded sites with fewer farms and a sparse human population.

69 To investigate the degree of inter-connectedness between adjacent river systems and therefore  
70 potential for reinvasion, we compared the relatedness of *G. f. fuscipes* collections from River Kochi  
71 with collections from the neighbouring River Enyau, pre-intervention (shown in Figure 1). The  
72 sampling sites upstream on the River Enyau were in a mixture of grassland and bushland, with dry  
73 thickets and wooded sites downstream.

### 74 Tsetse collection

75 *Glossina f. fuscipes* were collected in March and August 2014, in the upper and lower Kochi areas,  
76 before any vector control implementation, as well as along River Enyau. This was then followed by the  
77 deployment of the Tiny Targets between January 2016 within the area of Koboko District extending  
78 along the upper ends of River Kochi. Tsetse were then collected during March 2016 in both the  
79 intervention and non-intervention blocks. Details of the collections are summarized in Table 1.

80 Samples of *G. f. fuscipes* were collected using pyramidal traps deployed along the river bank. GPS  
81 coordinates for every trapping location were recorded. Traps were placed at least 100 m apart and

82 emptied at 24 h intervals over a three-day period per sampling site. Captured tsetse were individually  
83 preserved in 95% ethanol and stored at -20°C for subsequent analyses.

#### 84 **DNA extraction and microsatellite genotyping**

85 We initially developed a panel of 41 novel microsatellite markers using *in silico* and experimental  
86 approaches, spanning 96.9% of the ~374 Mb tsetse genome. DNA was then extracted for each *G. f.*  
87 *fuscipes* specimen using the Qiagen DNeasy blood and tissue kit (Qiagen, Inc., Valencia, CA). The tsetse  
88 legs, head and thorax were used. A total of 48 *G. f. fuscipes* specimen per treatment group, comprising  
89 both males and females, were then genotyped using 41 pairs of microsatellite primers grouped into  
90 eight panels (summarized in Table 2). The sample size choice was based on a simulation study that  
91 predicted precise estimations of  $N_e$  for organisms with relatively low  $N_e < 200$  could be obtained with  
92 10-20 loci, 10 alleles and 50 samples (Waples and Do, 2010).

93 To run the PCR reactions, we initially prepared a mix in water containing 2 µM of each of the primers  
94 per panel. For the reaction mix, we added 6.25 µl of a 2x Type-it Multiplex PCR master mix, 1.25 µL of  
95 the 10x primer mix and 3 µL of RNase-free water. 10.5 µL of this reaction mix was then dispensed into  
96 separate wells. 2 µL template DNA was then added to the individual PCR wells containing the reaction  
97 mix making a total volume of 12.5 µl. For the PCR program, we started with an initial heat-activation  
98 step at 95°C for 5 min to activate the HotStarTaq Plus DNA Polymerase, followed by 28 three-step  
99 cycles of denaturation at 95°C for 30 s, annealing at 60°C for 90 s, and extension at 72°C for 30 s. This  
100 was then followed by a final extension at 60°C for 30 min. Agarose gels for each product were then  
101 run to confirm success of the PCR. 1:10 dilutions of each of the PCR product were then prepared and  
102 the samples shipped to Macrogen, South Korea for genotyping.

103 Electropherograms were scored using GeneMarker (SoftGenetics). Fragment sizes were exported into  
104 Excel and then analysed using R software package MsatAllele (Alberto, 2009), to obtain the final allele  
105 classifications.

106

#### 107 **Data analysis**

108 We tested hypotheses of presence of population structure in the tsetse collections, due to either  
109 geographical isolation and/ or drift associated with vector control intervention.

#### 110 **Microsatellite characterization**

111 We explicitly checked the loci for patterns of sex-linked inheritance. We constructed two genotype  
112 files, one containing males and the other containing females and then ran allele frequency analyses  
113 on each data set. Polymorphic X-linked loci will have observed heterozygosity of zero in males and  
114 non-zero in females.

115 We then determined the allelic richness in the entire dataset and the polymorphic information content  
116 (PIC) of only 40 loci since one locus characteristically had many stutter peaks, that made it very difficult  
117 to generate a score that reflects the true genotype. We calculated both the expected and observed  
118 heterozygosity in the population and the frequency of null alleles using two independent methods  
119 based on either an iterative expectation and maximization (EM) approach implemented in GENEPOP  
120 (Raymond and Rousset, 1995), or a likelihood approach implemented in CERVUS (Kalinowski et al.,  
121 2007).

122

## 123 **Contemporary $N_e$ and Linkage Disequilibrium (LD)**

124 We estimated  $N_e$  using a single-sample LD method (Waples and Do, 2010). An effect of low population  
125 size is that the small number of parents usually produce offspring with increased levels of random LD,  
126 which can be measured as a product of the squared correlation ( $r^2$ ) of alleles at different loci. If the  
127 loci are unlinked, then the magnitude of LD can be estimated as:

$$128 \quad E(r^2) \approx \frac{1}{3N_e} + \frac{1}{S} \quad (1)$$

129 Where  $S$  is the number of individuals in the sample. There are many allele combinations when many  
130 polymorphic markers are used and this substantially increases the power of the LD method to detect  
131 drift.

132 Two estimates of  $N_e$  were calculated based on either a randomly mating population without selfing  
133 or a population that randomly mates and then undergoes lifetime monogamy. All calculations were  
134 performed using NeEstimator V2.1 (Do et al., 2014). We excluded alleles at a frequency of <5% as  
135 described by (Waples and Do, 2010) since the LD method has little or no bias at  $P_{crit} \geq 0.05$ , and the  
136 empirical correction method was developed for such data that excluded alleles at a frequency of  
137 <5%.

138  
139 The LD method also assumes a closed population with limited migration as well as loci that are under  
140 random recombination. We tested for deviations from Linkage Equilibrium using GENEPOP 4.5  
141 (Raymond and Rousset, 1995).

142

## 143 **Bayesian clustering analyses**

144 We employed a Bayesian clustering approach using *STRUCTURE* 2.0 (Pritchard et al., 2000), to  
145 delineate population boundaries and identify groups with distinctive allele frequencies. This method  
146 calculates the likelihood of data being grouped into a given number of clusters that maximize Hardy  
147 Weinberg Equilibrium and minimise LD. To perform this analysis, we set most parameters to their  
148 default values as recommended in the user's manual (Pritchard et al., 2003). We chose the admixture  
149 model and correlated allele frequencies between populations, as this configuration has been  
150 considered optimal in subtle population structure (Falush et al., 2003, Rodríguez-Ramilo et al., 2009),  
151 and inferred the degree of admixture  $\alpha$  from the data.  $\lambda$ , the parameter of the distribution  
152 of allelic frequencies, was set to one. The lengths of the burn-in and MCMC (Markov chain Monte  
153 Carlo) calculation were each set to 50000.

154

## 155 **Results**

### 156 **Microsatellite characterization**

157 We genotyped 41 microsatellite loci. Electropherograms for one locus had multiple peaks and this  
158 marker was dropped from the dataset. There was no evidence for patterns of sex-linked inheritance  
159 with any of the 40 microsatellite loci. Estimates of observed heterozygosity for all loci, in either female  
160 or the male stratifications were above 5% except for one locus that was monomorphic in both  
161 populations (shown in Supplementary 1). The average number of alleles per locus across the 192

162 samples was 7.2, ranging from 2 – 15 alleles. The Polymorphic Information Content (PIC) values ranged  
163 from 0.11 – 0.8 (shown in Supplementary 2). We restricted our analyses to 37 microsatellite loci where  
164 data were available from all temporal and spatial samples.

165 A possible draw back with microsatellite markers is the likelihood of null alleles, which could spuriously  
166 increase observed homozygosity estimates. Given that, the impact of these purported null alleles on  
167 downstream analyses in natural populations is not well known, we further filtered the genotyped  
168 panel down to 29 loci, with which 96.6% of the markers have null allele frequency estimates of  $\leq 0.4$   
169 and 75.9% of markers have null allele frequency of  $\leq 0.2$ . The latter is considered rare and uncommon  
170 with probably minimal effect on the exclusion probability of a locus (Dakin and Avise, 2004). Results  
171 using a panel of 37 loci were compared with those using a panel of 29 loci.

172

### 173 **Linkage Disequilibrium tests**

174 Of the 2664 population-by-locus tests of LD after applying a Bonferroni correction, only 51 (1.9%)  
175 showed significant departures. Similarly, for the panel of 29 loci, only 18 (1.1 %) tests showed  
176 significant ( $p < 0.05$ ) evidence of LD after applying a Bonferroni correction (shown in Supplementary 3).

177

### 178 **STRUCTURE analysis**

179 We used the coefficient *Q-matrix* to deduce the proportion of membership initially for only the two  
180 pre-intervention reference populations (results summarized in Figure 2).

181 At  $K=2$ , there was a clear separation of populations upstream and downstream of the river with no  
182 traces of admixture or recent migrants, and membership of  $>99.6\%$  to either of the two clusters  
183 inferred. This clearly suggests that the habitats upstream and downstream are discrete.

184 We then included the post-intervention collections into the analysis. At  $K=2$ , there was a clear spatial  
185 separation of populations based on geographical collection either upstream and downstream, with  
186 membership of  $>99\%$  in either of the two clusters.

187 At  $K=3$ , there was clear genetic divergence in temporal samples in the intervention block, with  
188 membership of  $>98.4\%$  in either of the two inferred clusters. Samples in the non-intervention block  
189 maintained admixture levels of 98.7% and 99.3%. This result suggests that temporal samples in the  
190 non-intervention arm share a more recent ancestor and are probably the same population, however  
191 for the temporal samples in the intervention, the results clearly suggest occurrence of a strong recent  
192 drift event, which has consequently resulted in divergence of allele frequencies.

193

### 194 **Contemporary $N_e$ estimates.**

195 We estimated  $N_e$  using two models that assumed either random mating between individuals without  
196 selfing, or random mating followed by lifelong monogamy (summarized in Figure 3 and Table 3). In  
197 both models,  $N_e$  estimates were temporally stable in the non-intervention area, and all had  
198 overlapping confidence intervals and thus suggestive of a non-significant difference.

199 In contrast, within the intervention area, the introduction of the Tiny Targets was followed with a  
200 drastic reduction in  $N_e$  of  $>50\%$  from baseline levels.

201 Given that we did not know the impact of purported null allele frequencies on  $N_e$  we also used a  
202 filtered data set of 29 microsatellite markers. There were no qualitative differences in the trend  
203 observed using either sample set. The random mating model followed with lifelong monogamy,  
204 arguably more relevant to tsetse flies, gave consistently higher estimates of  $N_e$  in all the estimates.

#### 205 **Movement of tsetse between rivers.**

206 We used *STRUCTURE* to assess if there were any recent migrants between rivers Kochi and Enyau,  
207 either upstream or downstream (shown in Figure 4). Populations show segregation both between and  
208 within rivers. At  $K=3$ , there was clear genetic divergence in spatial samples upstream and downstream  
209 river Kochi, and between rivers Kochi and Enyau, with a mean similarity score of 99.7%. Spatial  
210 resolution in samples collected along river Enyau was not evident but this could possibly be as a result  
211 of the fewer samples genotyped from this area.

212

#### 213 **Discussion**

214 We investigated genetic variation at 37 microsatellite loci in populations of *G. f. fuscipes* from the  
215 upper and lower reaches of a primary river tributary within an endemic HAT focus, in an attempt to  
216 assess the impact of vector control using Tiny Targets.

217

#### 218 **Geospatial effects**

219 The presence of genetically discrete populations of *G. f. fuscipes* along the single hydrographical  
220 network was assessed using both *a posteriori* and *a priori* knowledge about the origins of the  
221 individuals. This was necessary for our study in order to determine the independence of the two  
222 populations in estimating changes in  $N_e$ . Methods for estimating  $N_e$  are based on the assumption that  
223 the only factor responsible for changes in the genetic properties of a population is genetic drift and  
224 that systematic forces of mutation, selection and migration are absent.

225 Mutation rates are often very low and the gamete frequency changes caused by mutation are  
226 inversely proportional to population size, so that mutations usually make negligible contribution to  
227 overall levels of gametic disequilibrium (Hamilton, 2011).

228 Effects of selection could also be ignored given the neutrality of our markers, and direct selection on  
229 most markers are unlikely to be strong enough to cause substantial changes in allele frequencies.  
230 However, the effects of migration are not negligible and can substantially bias the estimates of  $N_e$   
231 either upwards or downwards (Wang and Whitlock, 2003). Our results reveal strong genetic  
232 structuring between tsetse samples from the upper and lower reaches of the river and within the  
233 neighbouring river system.

234

#### 235 **Seasonal effects**

236 Estimates of  $N_e$  can be sensitive to strong reductions in population size. If population size varies  
237 between generations,  $N_e$  will be the harmonic mean of the single generation effective sizes and thus  
238 will approximate the lowest size (Nei, 1987, Waples, 1991). Temporal variations in the  $N_e$  of *G. f.*  
239 *fuscipes* in lower Kochi were 57.6 and 54, and the 95% CIs overlapped. Thus, extreme bottlenecks are  
240 unlikely to have occurred in these populations over the 1.5-year sampling interval. These  $N_e$  results of

241 temporal stability were consistent with other studies (Echodu et al., 2011, Hyseni et al., 2012, Opiro  
242 et al., 2016).

243 These results are also consistent with entomological data showing that in areas without any tsetse  
244 control, *G. fuscipes* numbers are relatively stable with mean daily catches ranging between 0.7 and  
245 3.9 tsetse/trap (mean = 1.9) (Tirados et al., 2015). This interseasonal range in catches however greatly  
246 varies for savannah tsetse, ranging from 35- and 13-fold differences between the lowest and highest  
247 for *G. morsitans* and *G. pallidipes* (Hargrove and Vale, 1980), and has also been shown to vary for  
248 other insect disease vectors such as mosquitoes with lower catches during the dry season (Lehmann  
249 et al., 2014).

250

### 251 **Impact of vector control using the Tiny Targets**

252 Our empirical findings conclusively show a severe genetic bottleneck seemingly caused by the  
253 deployment of Tiny Targets. The baseline  $N_e$  in the intervention block was reduced by nearly 50% from  
254 117.5 (95% CI; 90-165) to 61.2 (95% CI; 51-75.1), and these results are qualitatively consistent with  
255 field data showing a reduction in tsetse catches by up to 90% after implementation of Tiny Targets  
256 tools (Tirados et al., 2015). This was also supported by evidence of distinct population structure in  
257 populations before and after vector control implementation using Bayesian approaches.

258 The mean generation time of tsetse is approximately 73 days, and this would generally account for  
259 the time of deposition of the mother tsetse to the time of deposition of all her own offspring. In our  
260 study, effects of drift were evident throughout the 2-y sampling period equivalent to five generations.  
261 These results might probably hint to the presence of selective sweeps in genomic regions of these  
262 tsetse populations after sustained application of vector control.

263

### 264 **Implications of these results in efforts to control vector-borne diseases**

265 The efficiency of vector control may be improved using knowledge on the population genetics of the  
266 target species. In this study, we have shown that there is large and significant genetic differentiation,  
267 and restricted gene flow within tsetse populations, and that spatially limited interventions can be  
268 effective.

269 Tsetse are highly mobile, dispersing diffusively at up to 1 km a day; studies of *G. f. fuscipes* in Uganda  
270 have shown that this species disperses at ~350 m/day (Rogers, 1977, Vale et al., 1984). A common  
271 long-term threat to tsetse control programmes is that tsetse from neighbouring areas will re-invade  
272 and/or survivors within the intervention area will form the basis of a new population once control is  
273 relaxed. Estimates of  $N_e$  and population genetic structure indices, could help in assessing the suitability  
274 of the operational units selected for vector control and hence assist in the design of sustainable  
275 interventions.

276

### 277 **Acknowledgement**

278 We would like to thank Jessica Lingley and Emily Rippon who helped through the lab work and the  
279 field team based in Uganda who assisted in the fieldwork collections including: Victor Drapari, Edward  
280 Aziku, and Henry Ombanya.

281

## References

- ALBERTO, F. 2009. MsatAllele\_1. 0: an R package to visualize the binning of microsatellite alleles. *Journal of Heredity*, 100, 394-397.
- COURTIN, F., CAMARA, M., RAYAISSSE, J.-B., KAGBADOUNO, M., DAMA, E., CAMARA, O., TRAORÉ, I. S., ROUAMBA, J., PEYLHARD, M. & SOMDA, M. B. 2015. Reducing human-tsetse contact significantly enhances the efficacy of sleeping sickness active screening campaigns: a promising result in the context of elimination. *PLoS neglected tropical diseases*, 9, e0003727.
- DAKIN, E. & AVISE, J. 2004. Microsatellite null alleles in parentage analysis. *Heredity*, 93, 504.
- DO, C., WAPLES, R. S., PEEL, D., MACBETH, G., TILLET, B. J. & OVENDEN, J. R. 2014. NeEstimator v2: re-implementation of software for the estimation of contemporary effective population size ( $N_e$ ) from genetic data. *Molecular ecology resources*, 14, 209-214.
- ECHODU, R., BEADELL, J. S., OKEDI, L. M., HYSENI, C., AKSOY, S. & CACCONI, A. 2011. Temporal stability of *Glossina fuscipes fuscipes* populations in Uganda. *Parasites & vectors*, 4, 19.
- FALUSH, D., STEPHENS, M. & PRITCHARD, J. K. 2003. Inference of population structure using multilocus genotype data: linked loci and correlated allele frequencies. *Genetics*, 164, 1567-1587.
- HAMILTON, M. 2011. *Population genetics*, John Wiley & Sons.
- HARGROVE, J. & VALE, G. 1980. Catches of *Glossina morsitans morsitans* Westwood and *G. pallidipes* Austen (Diptera: Glossinidae) in odour-baited traps in riverine and deciduous woodlands in the Zambesi Valley of Zimbabwe. *Bulletin of Entomological Research*, 70, 571-578.
- HYSENI, C., KATO, A. B., OKEDI, L. M., MASEMBE, C., OUMA, J. O., AKSOY, S. & CACCONI, A. 2012. The population structure of *Glossina fuscipes fuscipes* in the Lake Victoria basin in Uganda: implications for vector control. *Parasites & vectors*, 5, 222.
- KALINOWSKI, S. T., TAPER, M. L. & MARSHALL, T. C. 2007. Revising how the computer program CERVUS accommodates genotyping error increases success in paternity assignment. *Molecular ecology*, 16, 1099-1106.
- LEHANE, M., ALFAROUKH, I., BUCHETON, B., CAMARA, M., HARRIS, A., KABA, D., LUMBALA, C., PEKA, M., RAYAISSSE, J.-B. & WAISWA, C. 2016. Tsetse control and the elimination of Gambian sleeping sickness. *PLoS neglected tropical diseases*, 10, e0004437.
- LEHMANN, T., DAO, A., YARO, A., DIALLO, M., TIMBINÉ, S., HUESTIS, D., ADAMOU, A., KASSOGUÉ, Y. & TRAORÉ, A. 2014. Seasonal variation in spatial distributions of *Anopheles gambiae* in a Sahelian village: evidence for aestivation. *Journal of medical entomology*, 51, 27-38.
- LINDH, J. M., TORR, S. J., VALE, G. A. & LEHANE, M. J. 2009. Improving the cost-effectiveness of artificial visual baits for controlling the tsetse fly *Glossina fuscipes fuscipes*. *PLoS Neglected Tropical Diseases*, 3, e474.
- MAHAMAT, M. H., PEKA, M., RAYAISSSE, J.-B., ROCK, K. S., TOKO, M. A., DARNAS, J., BRAHIM, G. M., ALKATIB, A. B., YONI, W. & TIRADOS, I. 2017. Adding tsetse control to medical activities contributes to decreasing transmission of sleeping sickness in the Mandoul focus (Chad). *PLoS neglected tropical diseases*, 11, e0005792.
- NEI, M. 1987. *Molecular evolutionary genetics*, Columbia university press.



- OPIRO, R., SAARMAN, N. P., ECHODU, R., OPIYO, E. A., DION, K., HALYARD, A., AKSOY, S. & CACCONI, A. 2016. Evidence of temporal stability in allelic and mitochondrial haplotype diversity in populations of *Glossina fuscipes fuscipes* (Diptera: Glossinidae) in northern Uganda. *Parasites & vectors*, 9, 258.
- PRITCHARD, J. K., STEPHENS, M. & DONNELLY, P. 2000. Inference of population structure using multilocus genotype data. *Genetics*, 155, 945-959.
- PRITCHARD, J. K., WEN, W. & FALUSH, D. 2003. Documentation for STRUCTURE software: Version 2.
- RAYMOND, M. & ROUSSET, F. 1995. GENEPOP (version 1.2): population genetics software for exact tests and ecumenicism. *Journal of heredity*, 86, 248-249.
- RODRÍGUEZ-RAMILO, S. T., TORO, M. A. & FERNÁNDEZ, J. 2009. Assessing population genetic structure via the maximisation of genetic distance. *Genetics Selection Evolution*, 41, 49.
- ROGERS, D. 1977. Study of a natural population of *Glossina fuscipes fuscipes* Newstead and a model of fly movement. *The Journal of Animal Ecology*, 309-330.
- TIRADOS, I., ESTERHUIZEN, J., KOVACIC, V., MANGWIRO, T. C., VALE, G. A., HASTINGS, I., SOLANO, P., LEHANE, M. J. & TORR, S. J. 2015. Tsetse control and Gambian sleeping sickness; implications for control strategy. *PLoS Negl Trop Dis*, 9, e0003822.
- TORR, S., MAUDLIN, I. & VALE, G. 2007. Less is more: restricted application of insecticide to cattle to improve the cost and efficacy of tsetse control. *Medical and veterinary entomology*, 21, 53-64.
- VALE, G., HURSEY, B., HARGROVE, J., TORR, S. & ALLSOPP, R. 1984. The use of small plots to study populations of tsetse (Diptera: Glossinidae): Difficulties associated with population dispersal. *International Journal of Tropical Insect Science*, 5, 403-410.
- WANG, J. & WHITLOCK, M. C. 2003. Estimating effective population size and migration rates from genetic samples over space and time. *Genetics*, 163, 429-446.
- WAPLES, R. S. 1991. Genetic methods for estimating the effective size of cetacean populations. *Report of the International Whaling Commission (special issue)*, 13, 279-300.
- WAPLES, R. S. & DO, C. 2010. Linkage disequilibrium estimates of contemporary  $N_e$  using highly variable genetic markers: a largely untapped resource for applied conservation and evolution. *Evolutionary Applications*, 3, 244-262.

1 **Figures**

2  
3  
4  
5  
6  
7  
8  
9  
10  
11  
12  
13  
14

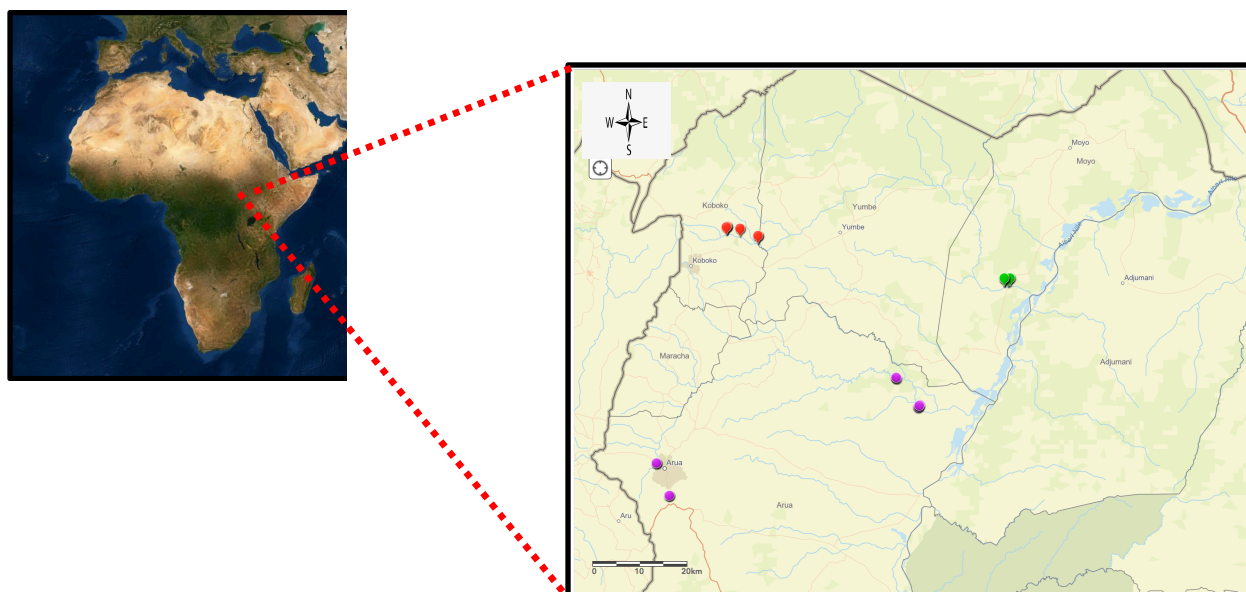

15 **Figure 1.** Sampling sites along rivers Kочи and Enyau in North-West Uganda. Red dots show tsetse  
16 collection sites that are within the vector control treatment (intervention) block, whereas orange  
17 dots show trap sites within the no vector control treatment (non-intervention) block. Purple dots  
18 show collection sites along the Enyau river (The map was created using ArcGIS:  
19 <https://www.arcgis.com/index.html#>).

20  
21 **Table 1.** Details of tsetse specimen sampled in both the intervention and non-intervention blocks  
22 along River Kочи

| Collection site    | Collection date | Gender                   | Sample size |
|--------------------|-----------------|--------------------------|-------------|
| <b>Lower Kochi</b> | August 2014     | Female = 30<br>Male = 18 | 48          |
|                    | March 2016      | Female = 34<br>Male = 14 | 48          |
| <b>Upper Kochi</b> | March 2014      | Female = 32<br>Male = 16 | 48          |
|                    | March 2016      | Female = 31<br>Male = 17 | 48          |

23

24 **Table 2.** Tsetse microsatellite primer sequences developed in this study

| <b>ID_Scaffold</b> | <b>Forward primer</b>   | <b>Reverse primer</b>    |
|--------------------|-------------------------|--------------------------|
| TDM_322            | CTGCTGCTAACCAAGCCAGAC   | TCACTATCTTAACCATGTTCCGGA |
| TDM_54             | ACGCCTCAGATGTTAGTGCT    | AATTGCAGCCTCAAACGGAC     |
| TDM_421            | ACTCTCACCTTGCTATTTGTCT  | GCTCACACTCGTATCATTCGC    |
| TDM_293            | GCGTAAAAGGGAAGAGGAGC    | TGCTGAGTTAGTTCCACTGGA    |
| TDM_1.2            | CCATCACTACAACGGCAA      | TGTGACCGACATTGGCTTTT     |
| TDM_498            | GCATCACTCCCCGCAATATC    | CCCCAACATCAAAAGGACCC     |
| TDM_992            | CGCACAACAAAGACTACGC     | AGAGAAGAGCGTTGGTTGGA     |
| TDM_600            | CGTCAGCTCAACACCATCCT    | ACTGCGAATGTTGTGTCCAA     |
| TDM_275            | TTCCGGCTCTATAACCACCG    | TGCAGCCATACTCAGAACTC     |
| TDM_94             | ATTTTCGTCATAGTGTCTCAGCT | CGCAATTACACATGGGCAGA     |
| TDM_509            | CCCCTTTCACTGACATAAGAAGA | CCATCACCAGAGAGAATGCC     |
| TDM_342            | ATTGCTTGACCCATAGAGC     | GGAACGACGCAGATAAGGCT     |
| TDM_547            | AACGTATTGCCAGCGGTTAC    | AAACATAGTCGCATCCACGC     |
| TDM_505            | TTGCCTCCTTATGAACGGT     | TAGAGGTGCAACTGAGTGGG     |
| TDM_244            | AGTTAGTCTCGTCCGCTGTT    | AGGGAGAGGTAAGCTGACAG     |
| TDM_537            | ACATCCCCAACGCTGAAGTA    | CCTAGAAATCCGGCGTGCTA     |
| TDM_389            | ACATATCAGGGCACAGTAAGC   | ATGCGATACACAACGAGCTG     |
| TDM_465            | AAATGCTCCCACCAATCAGT    | TTTACACAAGACCGCCATGC     |
| TDM_196            | TGGAATTGCTTGCGAACAGT    | TCGCTGAAAATCGAGGACCA     |
| TDM_360            | TTGCTTTTACCCGCTACAT     | TTCATGCGGCTGTTGTCAAT     |
| TDM_9              | TACACTCGTCAGTCTTCGGC    | TTTGAATGGGATGCGTGAG      |
| TDM_325            | CCCAACGCAAATACACACGA    | TGTTGTCCTCTACGGTGTGT     |
| TDM_333            | AGGAGGCGTATTACCCGATG    | GTCAGGGCTAACGGGAATTT     |
| TDM_200            | CGGGAGTGTTTTAGGCAAG     | GGCATACTGTGGAAAGTTTGT    |
| TDM_161            | CCTCAGACACCACCCAGTTA    | CTTCCCTCTCTCACCACG       |
| TDM_300            | CTGTAATGACGGCGGAACA     | TTCGTTGCGTTCTCATCTCC     |
| TDM_104.2          | GGTTCGAATCTCAAGTGCGG    | ACCATAAGCCACGTCCTCA      |
| TDM_175            | TATGGGTACGTGTGCTTGGG    | GTGTCACGTCATCAGTCAACT    |
| TDM_733            | GCATCTACACACGGCTCCTA    | AGGGAAAAGTCTGGTCACT      |
| TDM_122            | TGACGCTACTGATTTGAGGGA   | TGCATTATACGCTGACACATCA   |
| TDM_450            | GAAGTTAGTTTTCCACGTTTCGC | GGTTGTCGCCTATTCTTGAAGT   |
| TDM_1.1            | TGCCGCGTGATAATTTACCA    | TGACCAGAGGACAAACGGAA     |
| TDM_662            | TACTTGACAACCTGACGGCT    | AACCTAAAGCCCGTCAGTCT     |
| TDM_0              | TTTAGATCCTGCGTCTCCCC    | TCCGAAAACCAATACACACACC   |
| TDM_60             | GTGGAGTAAGTGCCGAGAT     | TAAGCTCATCACCACTGCT      |
| TDM_224            | CCTTCAAGCACATTTCCACTGA  | TTCCTGGCTCTACTACGC       |
| TDM_104.1          | AGCTAAAGTGGTCTAACTCGGT  | TGTACCACTTGCCAGTCTTT     |
| TDM_323            | AAACGGTTTCTCTTGCTGG     | AGATTCATCGTACCATCCCGT    |
| TDM_880            | AGTTATGGATTAGCACACGATGA | TCTTCTCAACCACCCAGCTT     |
| TDM_18             | TCACGCACCGATCCTGATAA    | TGCTTTCCTCCTGTACTCTCA    |
| TDM_149            | TGATGTGTTGGATAGCAGCAG   | AGCCATGAGACCCACGTTAA     |

25

26

27

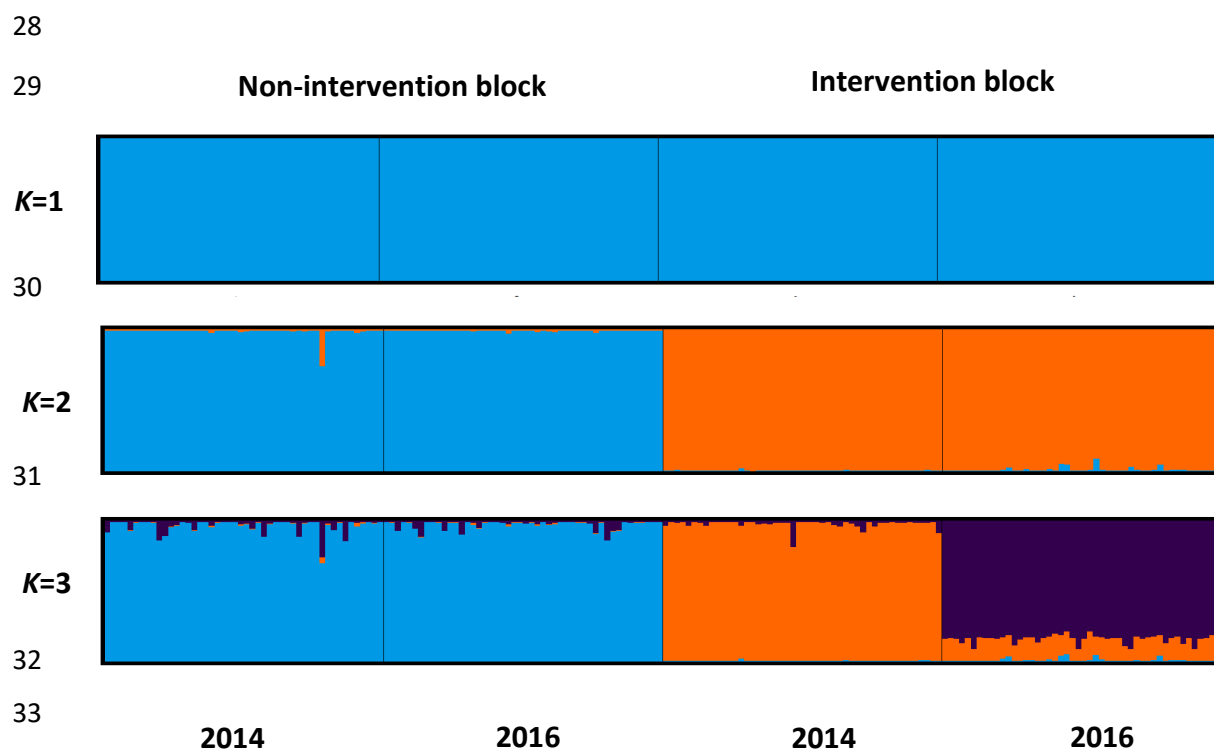

35 **Figure 2.** Estimated population structure of *G. f. fuscipes* along River Kochi. Each individual is  
36 represented by a thin vertical line, which is partitioned into  $K$  coloured segments that represent the  
37 individual's estimated membership fractions in  $K$  clusters. Black lines separate individuals of different  
38 populations. Twenty-five *structure* runs at each  $K$  produced individual membership coefficients,  
39 having pairwise similarity coefficients above 0.97. The figure shown for  $K$  is based on the highest  
40 probability run at that

41  
42  
43  
44  
45  
46  
47  
48  
49  
50  
51  
52  
53

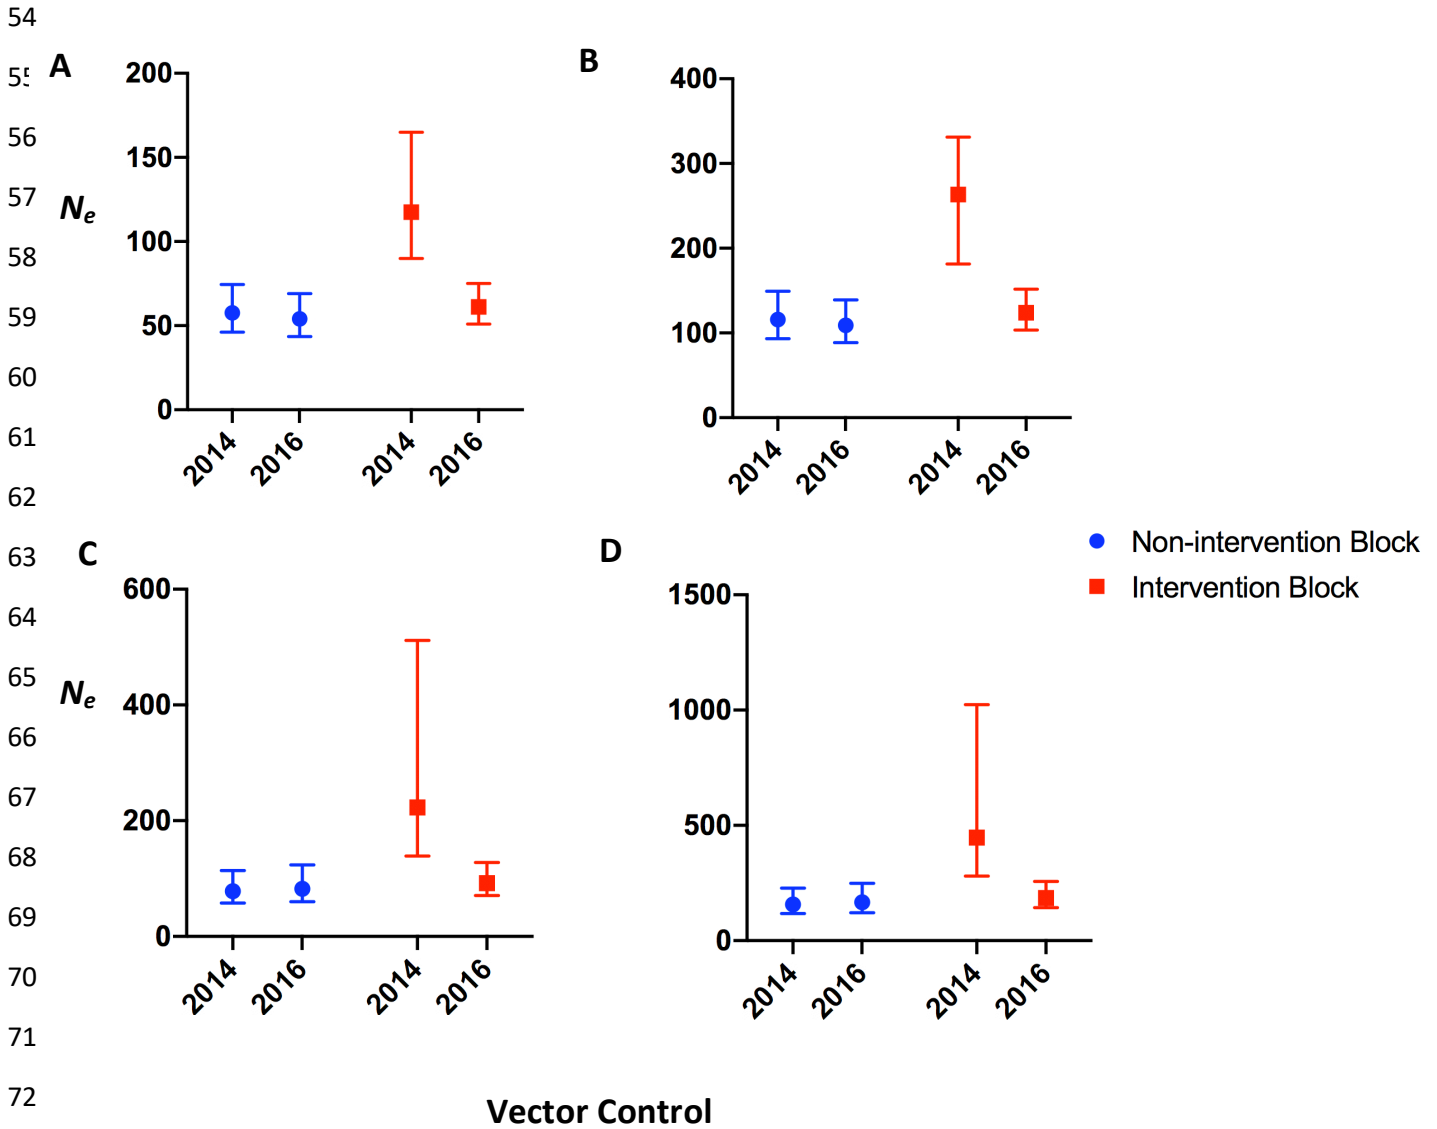

74 **Figure 3.** Temporal changes in effective population sizes in areas without vector control (blue dots)  
75 and areas with anti-vector Tiny Target tools (red dots), using either a panel of 37 microsatellite  
76 markers (A, B), or 29 microsatellite markers (C, D), and a model of a randomly mating population  
77 without selfing (A, C) or a population that randomly mates and then undergoes lifelong monogamy (B  
78 and D).

79  
80  
81  
82  
83  
84  
85

86 **Table 3.**  $N_e$  estimates in *G. f. fuscipes* collections along river Kochi

| Population      | $N_e$ | 95% Parametric CI |        | loci | Mating model  |
|-----------------|-------|-------------------|--------|------|---------------|
|                 |       | Lower             | Upper  |      |               |
| Downstream 2014 | 57.6  | 46.1              | 74.5   | 37   | Random mating |
| Downstream 2016 | 54.0  | 43.6              | 69.1   | 37   | Random mating |
| Upstream 2014   | 117.5 | 90                | 165    | 37   | Random mating |
| Upstream 2016   | 61.2  | 51                | 75.1   | 37   | Random mating |
| Downstream 2014 | 115.9 | 93.3              | 149.2  | 37   | Monogamy      |
| Downstream 2016 | 109.1 | 88.5              | 139.1  | 37   | Monogamy      |
| Upstream 2014   | 236.3 | 181.4             | 331.2  | 37   | Monogamy      |
| Upstream 2016   | 123.8 | 103.6             | 151.7  | 37   | Monogamy      |
| Downstream 2014 | 78.0  | 58                | 113.8  | 29   | Random mating |
| Downstream 2016 | 82.2  | 60                | 123.8  | 29   | Random mating |
| Upstream 2014   | 223.0 | 139               | 511.7  | 29   | Random mating |
| Upstream 2016   | 92.1  | 70.8              | 127.7  | 29   | Random mating |
| Downstream 2014 | 157.1 | 117.3             | 228.3  | 29   | Monogamy      |
| Downstream 2016 | 165.9 | 121.6             | 249.0  | 29   | Monogamy      |
| Upstream 2014   | 447.4 | 279.8             | 1024.0 | 29   | Monogamy      |
| Upstream 2016   | 185.6 | 143.1             | 256.9  | 29   | Monogamy      |

87

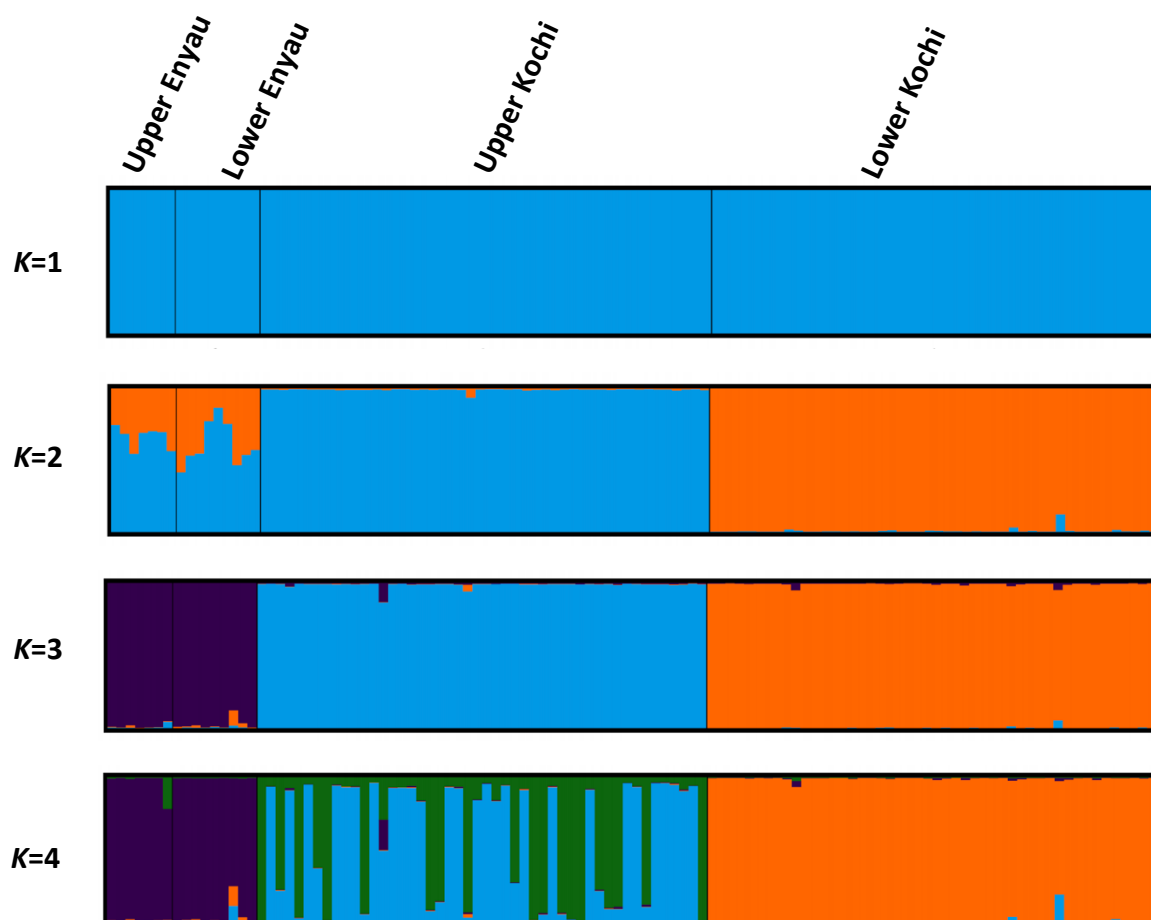

**Figure 4.** Estimated population structure of *G. f. fuscipes* between Rivers Kochi and Enyau. The figure shown for  $K$  is based on the highest probability run at that
